# Supplementary material for: CobB regulates Escherichia coli chemotaxis by deacetylating the response regulator CheY
Source: PubMed Central journal article supplement (PMC2883070; doi:10.1111/j.1365-2958.2010.07125.x), 2010-04-13
Supplement: mmi0076-1162-SD1.pdf [file mmi0076-1162-SD1.pdf]

## Supplementary Experimental procedures

### *Protein overexpression and purification*

CobB, CheY and FliM were over-expressed and purified by the same procedure. *E. coli* AD494 ( $\lambda$ DE3)/pET32a-*cobB* was induced by final concentrations of 1 mM IPTG at OD<sub>600</sub> = 0.6 for 4 h at 25 °C. *E. coli* BL21 ( $\lambda$ DE3)/pET20b-*cheY* and *E. coli* BL21 ( $\lambda$ DE3)/pET28a-*fliM* were induced by final concentrations of 0.4 mM IPTG at OD<sub>600</sub> = 0.5 for 7 h at 18 °C. Cells were harvested by centrifugation, resuspended in Binding Buffer [20 mM Tris-HCl (pH 7.9), 500 mM NaCl and 5 mM imidazole], and then disrupted using an Ultrasonic Cell Disruptor (VCX750, SONICS, US). The disrupted suspension was centrifuged and the supernatant was added to nickel chelate column (Amersham Bioscience, USA) pre-equilibrated with Binding Buffer. The column was washed initially with Washing Buffer [20 mM Tris-HCl (pH 7.9), 500 mM NaCl and 60 mM imidazole] and the histidine-tagged protein was eluted with Elution Buffer [20 mM Tris-HCl (pH 7.9), 500 mM NaCl and 200 mM imidazole]. According to the purity in the SDS-PAGE, the peak fractions were pooled, and concentrated by ultrafiltration with Storing Buffer [50 mM Tris-HCl (pH 7.9), 20% glycerol and 5 mM dithiothreitol]. The proteins were centrifuged at 20 000 g for 15 min and the supernatant was stored at -20 °C or -80 °C in aliquots. Protein purity was estimated to be > 90% on the basis of SDS-PAGE. The concentration of protein was measured by the bicinchoninic acid protein assay kit (Beyotime Biotechnology, Beijing, China) according to the manufacturer's protocol. The over-expression and purification of Acs were performed as described above, except that strain *E. coli*

DH5 $\alpha$ /pTrcHis2C-*acs* was used. To achieve acetylated Acs, 50 mM NAM was added simultaneously with IPTG during the course of protein expression (12 h, 25 °C) as previously described (Schwer *et al.*, 2006). For an unknown reason, this method did not work for expressing acetylated CheY.

### ***Protein digestion***

Gel lanes to be analyzed were excised from SDS-PAGE gels by razor blade and divided into 1 mm<sup>3</sup> pieces. Each section was washed in water and completely destained using 50% acetonitrile in 25 mM ammonium bicarbonate. A reduction step was performed by addition of 100  $\mu$ l of 10 mM DTT at 57°C for 1 hr. The proteins were alkylated by adding 100  $\mu$ l of 55 mM iodoacetamide and allowed to react in the dark at 20 °C for 30 min. Gel sections were first washed in water, then acetonitrile, and finally dried by SpeedVac (Thermo Fisher Scientific, Waltham, MA) for 30 min. Digestion was carried out using 20  $\mu$ g/ml sequencing grade modified trypsin (Promega, USA) in 50 mM ammonium bicarbonate. Sufficient trypsin solution was added to swell the gel pieces, which were kept at 4 °C for 45 min and then incubated at 37 °C overnight. The supernatants were transferred into a 200  $\mu$ l microcentrifuge tube and the gels were extracted once with extraction buffer (67% acetonitrile containing 2.5% trifluoroacetic acid). The peptide extract and the supernatant of the gel slice were combined and then completely dried in a SpeedVac centrifuge.

### ***Protein and peptide identification***

All the raw data files were processed using BioWorks 3.3.1 (Thermo Finnigan, San Jose, CA) and the derived peak list was searched using the MASCOT search engine

(Matrix Science, London, UK) against AC\_000091.fasta database([ftp://ftp.ncbi.nih.gov/genomes/Bacteria/Escherichia\\_coli\\_K\\_12\\_substr\\_W3110/](ftp://ftp.ncbi.nih.gov/genomes/Bacteria/Escherichia_coli_K_12_substr_W3110/)). The following search criteria were employed: full tryptic specificity was required; two missed cleavages were allowed; Carbamidomethylation was set as fixed modification, whereas Oxidation (M), Acetyl (K), and Acetyl (N-term) were considered as variable modifications. Initial mass deviation of precursor ion and fragment ions were allowed up to 10 ppm and 0.6 Da, respectively. The top protein of the identification result is chemotaxis protein in each sample.

### ***Electron microscopy***

Strains W3110 and the mutant derivatives were grown on the TB medium until the exponential phase. Cells were then harvested and washed gently with 10 mM phosphate buffer (pH 7.0), allowed to stick to a carbon-coated grid for 3 to 4 min, and then negatively stained with 2% phosphotungstic acid for 7 to 8 min (Armstrong *et al.*, 1967). The shape and number of flagella per cell were determined with the aid of a transmission electron microscope.

### **References**

- Armstrong, J. B., J. Adler & M. M. Dahl, (1967) Nonchemotactic mutants of *Escherichia coli*. *Journal of bacteriology* **93**: 390-398.
- Schwer, B., J. Bunkenborg, R. O. Verdin, J. S. Andersen & E. Verdin, (2006) Reversible lysine acetylation controls the activity of the mitochondrial enzyme acetyl-CoA synthetase 2. *Proceedings of the National Academy of Sciences of the United States of America* **103**: 10224-10229.

**Table S1. Mass spectrometry confirms Lysine-91 is acetylated on AcCheY.**

| #  | b         | b <sup>++</sup> | Seq. | y         | y <sup>++</sup> | #  |
|----|-----------|-----------------|------|-----------|-----------------|----|
| 1  | 171.1128  | 86.0600         | K    |           |                 | 28 |
| 2  | 300.1554  | 150.5813        | E    | 2749.4407 | 1375.2240       | 27 |
| 3  | 414.1983  | 207.6028        | N    | 2620.3981 | 1310.7027       | 26 |
| 4  | 527.2824  | 264.1448        | I    | 2506.3552 | 1253.6812       | 25 |
| 5  | 640.3664  | 320.6869        | I    | 2393.2711 | 1197.1392       | 24 |
| 6  | 711.4036  | 356.2054        | A    | 2280.1870 | 1140.5972       | 23 |
| 7  | 782.4407  | 391.7240        | A    | 2209.1499 | 1105.0786       | 22 |
| 8  | 853.4778  | 427.2425        | A    | 2138.1128 | 1069.5600       | 21 |
| 9  | 981.5364  | 491.2718        | Q    | 2067.0757 | 1034.0415       | 20 |
| 10 | 1052.5735 | 526.7904        | A    | 1939.0171 | 970.0122        | 19 |
| 11 | 1109.5949 | 555.3011        | G    | 1867.9800 | 934.4936        | 18 |
| 12 | 1180.6321 | 590.8197        | A    | 1810.9585 | 905.9829        | 17 |
| 13 | 1267.6641 | 634.3357        | S    | 1739.9214 | 870.4644        | 16 |
| 14 | 1324.6855 | 662.8464        | G    | 1652.8894 | 826.9483        | 15 |
| 15 | 1487.7489 | 744.3781        | Y    | 1595.8679 | 798.4376        | 14 |
| 16 | 1586.8173 | 793.9123        | V    | 1432.8046 | 716.9059        | 13 |
| 17 | 1685.8857 | 843.4465        | V    | 1333.7362 | 667.3717        | 12 |
| 18 | 1813.9807 | 907.4940        | K    | 1234.6678 | 617.8375        | 11 |
| 19 | 1911.0334 | 956.0204        | P    | 1106.5728 | 553.7900        | 10 |
| 20 | 2058.1018 | 1029.5546       | F    | 1009.5201 | 505.2637        | 9  |
| 21 | 2159.1495 | 1080.0784       | T    | 862.4516  | 431.7295        | 8  |
| 22 | 2230.1866 | 1115.5970       | A    | 761.4040  | 381.2056        | 7  |
| 23 | 2301.2238 | 1151.1155       | A    | 690.3668  | 345.6871        | 6  |
| 24 | 2402.2714 | 1201.6394       | T    | 619.3297  | 310.1685        | 5  |
| 25 | 2515.3555 | 1258.1814       | L    | 518.2281  | 259.6447        | 4  |
| 26 | 2644.3981 | 1322.7027       | E    | 405.1980  | 203.1026        | 3  |
| 27 | 2773.4407 | 1387.2240       | E    | 276.1554  | 138.5813        | 2  |
| 28 |           |                 | K    | 147.1128  | 74.0600         | 1  |

**Table S2. Mass spectrometry confirms Lysine-109 is acetylated on AcCheY.**

| #  | b         | b <sup>++</sup> | Seq. | y         | y <sup>++</sup> | #  |
|----|-----------|-----------------|------|-----------|-----------------|----|
| 1  | 129.1022  | 65.0548         | K    |           |                 | 28 |
| 2  | 258.1448  | 129.5761        | E    | 2791.4512 | 1396.2293       | 27 |
| 3  | 372.1878  | 186.5975        | N    | 2662.4087 | 1331.7080       | 26 |
| 4  | 485.2718  | 243.1395        | I    | 2548.3657 | 1274.6865       | 25 |
| 5  | 598.3559  | 299.6816        | I    | 2435.2817 | 1218.1445       | 24 |
| 6  | 669.3930  | 335.2001        | A    | 2322.1976 | 1161.6024       | 23 |
| 7  | 740.4301  | 370.7187        | A    | 2251.1605 | 1126.0839       | 22 |
| 8  | 811.4612  | 406.2373        | A    | 2180.1234 | 1090.5653       | 21 |
| 9  | 939.5258  | 470.2665        | Q    | 2109.0863 | 1055.0468       | 20 |
| 10 | 1010.5629 | 505.7851        | A    | 1981.0277 | 991.0175        | 19 |
| 11 | 1067.5844 | 534.2958        | G    | 1909.9906 | 955.4989        | 18 |
| 12 | 1138.6215 | 569.8144        | A    | 1852.9691 | 926.9882        | 17 |
| 13 | 1225.6535 | 613.3304        | S    | 1781.9320 | 891.4696        | 16 |
| 14 | 1282.6535 | 641.8411        | G    | 1694.9000 | 847.9536        | 15 |
| 15 | 1445.7383 | 723.3728        | Y    | 1637.8785 | 819.4429        | 14 |
| 16 | 1544.8067 | 772.9070        | V    | 1474.8152 | 737.9112        | 13 |
| 17 | 1643.8751 | 822.4412        | V    | 1375.7468 | 688.3770        | 12 |
| 18 | 1813.9807 | 907.4940        | K    | 1276.6783 | 638.8428        | 11 |
| 19 | 1911.0334 | 956.0204        | P    | 1106.5728 | 553.7900        | 10 |
| 20 | 2058.1018 | 1029.5546       | F    | 1009.5201 | 505.2637        | 9  |
| 21 | 2159.1495 | 1080.0784       | T    | 862.4516  | 431.7295        | 8  |
| 22 | 2230.1866 | 1115.5970       | A    | 761.4040  | 381.2056        | 7  |
| 23 | 2301.2238 | 1151.1155       | A    | 690.3668  | 345.6871        | 6  |
| 24 | 2402.2714 | 1201.6394       | T    | 619.3297  | 310.1685        | 5  |
| 25 | 2515.3555 | 1258.1814       | L    | 518.2821  | 259.6447        | 4  |
| 26 | 2644.3981 | 1322.7027       | E    | 405.1980  | 203.1026        | 3  |
| 27 | 2773.4407 | 1387.2240       | E    | 276.1554  | 138.5813        | 2  |
| 28 |           |                 | K    | 147.1128  | 74.0600         | 1  |

**Table S3. Primers used in this study.**

| Primer               | Sequence (5' to 3') *                                                                     |
|----------------------|-------------------------------------------------------------------------------------------|
| <i>cobB</i> deletion |                                                                                           |
| cobB-1s              | <u>ATGCTGTCGCGTCGGGGTCATCGGTTAAGTCGTTTTTCGTAAA AATAAACGCATATGAATATCCTCCTTAG</u>           |
| cobB-2a              | <u>TCAGGCAATGCTTCCCGCTTTTAATCCCTTCAGCAACTTTTCAACAAACTTGTAGGCTGGAGCTGCTTCG</u>             |
| <i>acs</i> deletion  |                                                                                           |
| acs-1s               | <u>ATGAGCCAAATTCACAAACACACCATTTCCTGCCAACATCGCAGACCGTTGCATATGAATATCCTCCTTAG</u>            |
| acs-2a               | <u>TTACGATGGCATCGCGATAGCCTGCTTCTCTTCAAGCAGCTTCTC GACTATGTAGGCTGGAGCTGCTTCG</u>            |
| <i>cheA</i> deletion |                                                                                           |
| cheA-1s              | <u>GTGAGCATGGATATAAGCGATTTTTATCAGACATTTTTTGATGAAGCGGACATATGAATATCCTCCTTAG</u>             |
| cheA-2a              | <u>TCAGGCGGCGGTGTTTCGCCATACGTTGTTTCGCGGTTTATCGCCTGCAAGGTGTAGGCTGGAGCTGCTTCG</u>           |
| <i>cheZ</i> deletion |                                                                                           |
| cheZ-1s              | <u>ATGATGCAACCATCAATCAAACCTGCTGACGAGCATTTCAGCTGGCGATATCATATGAATATCCTCCTTAG</u>            |
| cheZ-2a              | <u>TCAAAATCCAAGACTATCCAACAAATCGTCCACCTGATCCTGACTGGCTATGTAGGCTGGAGCTGCTTCG</u>             |
| Mutant Verification  |                                                                                           |
| cobB                 | s: ATCTCTTACCTGTAGCTCGTGTTCGG; a: AAAAGTGCGCGTGTATTATTCCG                                 |
| acs                  | s: CCCCTATGTGTAACAAATAACCA; a: TATCAGGCCTACAAACCGTTAC                                     |
| cheA                 | s: AGCCTGCTGGTACTGAACAA; a: CTCTTCATCACCAAGGGTAAATA                                       |
| cheZ                 | s: GTTGCAGGCAGGCGGTTATGGA; a: CGCCCACCAGCAAAAATCAGCAG                                     |
| Protein Expression   |                                                                                           |
| cobB                 | s: TAAAGA <b>ATT</b> CTGCTGTCGCGTCGGGGT; a: TAAT <b>CTCGAG</b> TCAGGCAATGCTTCCCGC         |
| acs                  | s: TATAG <b>GAT</b> CCGATGAGCCAAATTCACAAACACA; a: GCAT <b>GAATT</b> CCGATGGCATCGCGATAGC   |
| cheY                 | s: CGCG <b>CATAT</b> GGCGGATAAAGAACTTAAATT; a: ATAT <b>CTCGAG</b> CATGCCAGTTTCTCAAAGAT    |
| fliM                 | s: CGTGC <b>CATAT</b> GGGCGATAGTATTCTTTCTCA; a: TATA <b>CTCGAG</b> TATTTGGGCTGTTCCCTCGTTC |

\*Sequences which are homologous to the deleted gene are underlined, and boldface type indicates restriction sites.

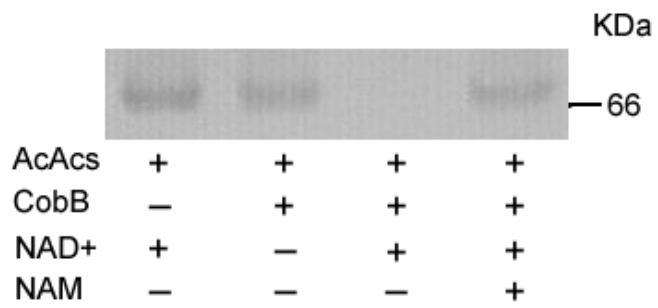

**Fig. S1.** CobB deacetylates AcAcs *in vitro*. The acetylation levels of AcAcs proteins were determined by Western blot using specific anti-acetyl lysine antibody.

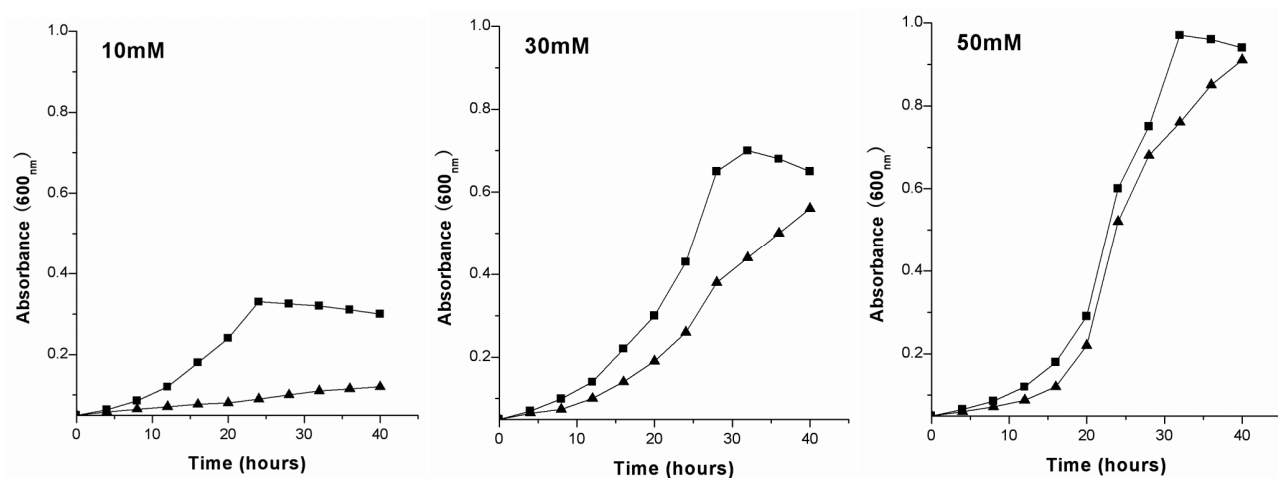

**Fig. S2.** Growth of W3110 and  $\Delta cobB$  mutant on acetate. The concentration of acetate in the Vogel-Bonner minimal medium was as indicated. The growth behavior of strains W3110 and W3110  $\Delta cobB$  mutant is shown by squares and triangles, respectively.



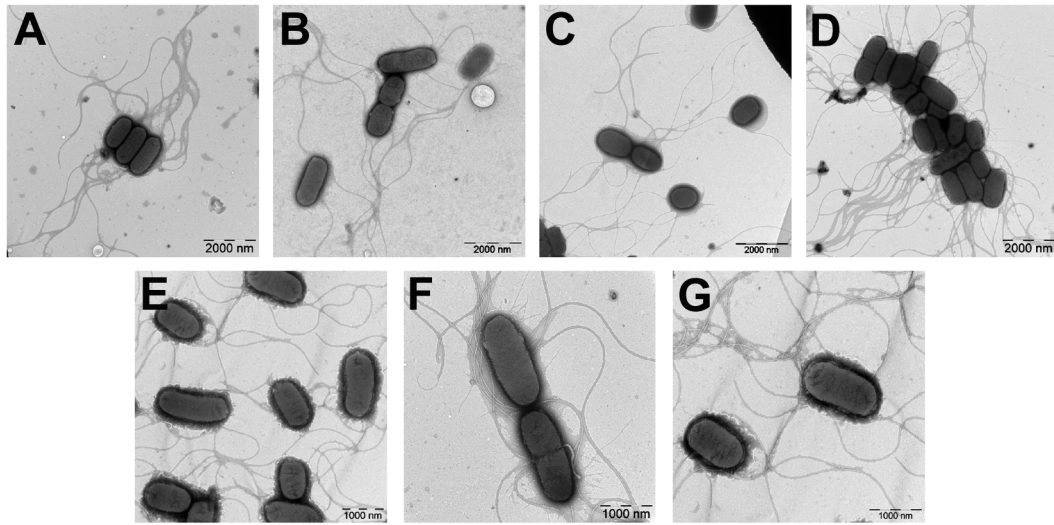

**Fig. S3.** Electron micrographs of the strains. The bacteria were grown on the TB medium to the exponential phase, washed gently with 10 mM phosphate buffer (pH 7.0), and stained with 2% phosphotungstic acid.

A. Wild type strain W3110. B. W3110  $\Delta cobB$  mutant. C. W3110  $\Delta acs$  mutant. D. W3110  $\Delta(cobB) \Delta(acs)$  mutant. E. W3110  $\Delta(cheA) \Delta(cheZ)$  mutant. F. W3110  $\Delta(cheA) \Delta(cheZ) \Delta(cobB)$  mutant. G. W3110  $\Delta(cheA) \Delta(cheZ) \Delta(acs)$  mutant.

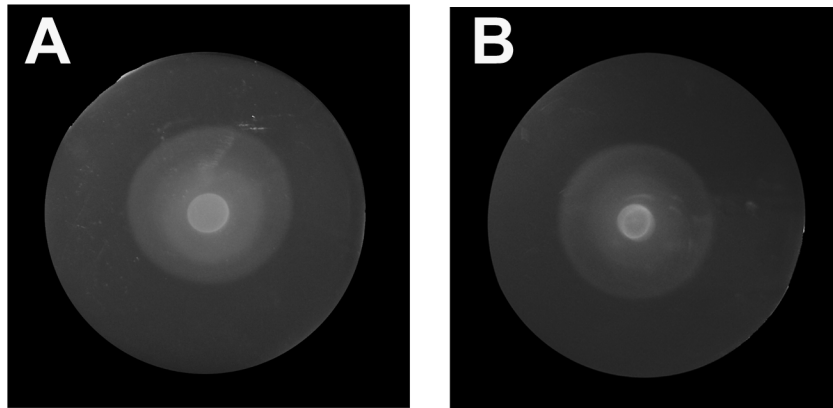

**Fig. S4.** Swarm assays on TB semisolid plates. The photographs were taken after 4 h of incubation at 35 °C.

A. Swarm ring formation by wild type strain AJW613.

B. Swarm ring formation by  $\Delta acs$  mutant AJW803.

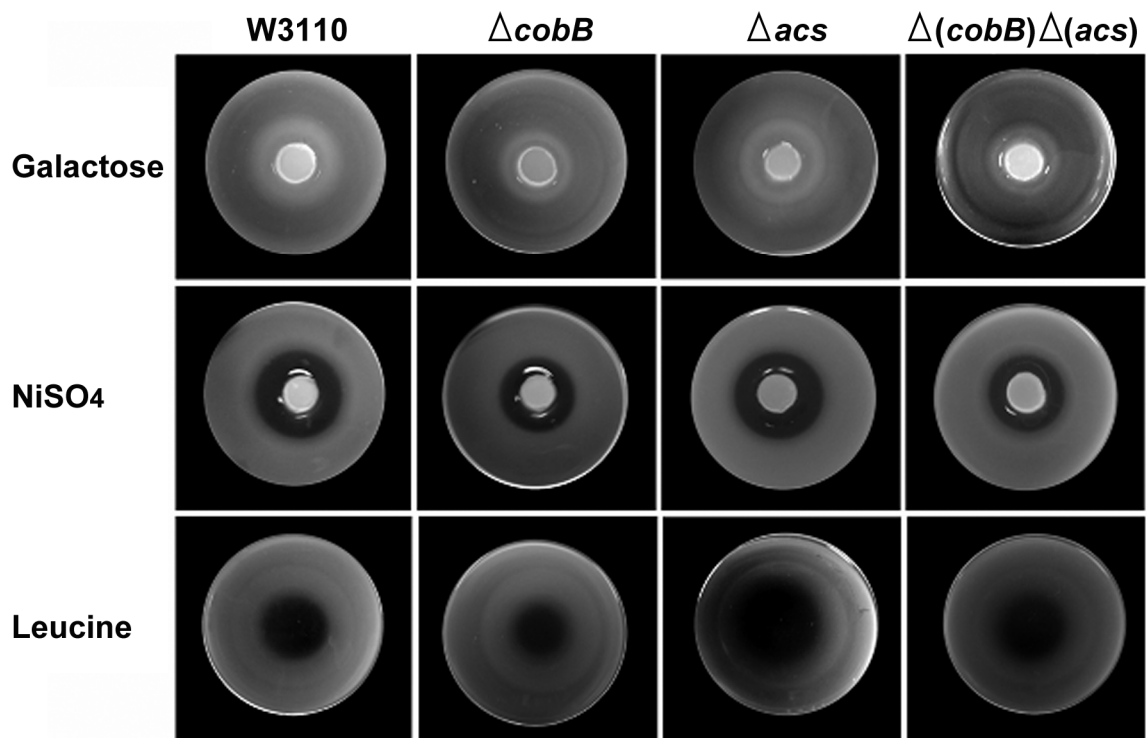

**Fig. S5.** Plug assays and drop assays of W3110,  $\Delta cobB$  mutant,  $\Delta acs$  mutant and  $\Delta(cobB)\Delta(acs)$  mutant. The concentrations of galactose plug, NiSO<sub>4</sub> plug and leucine drop were 50 mM, 25 mM and 100 mM, respectively. The medium was supplemented with 30 mM acetate. Experiments were replicated four times, and representative results are shown.

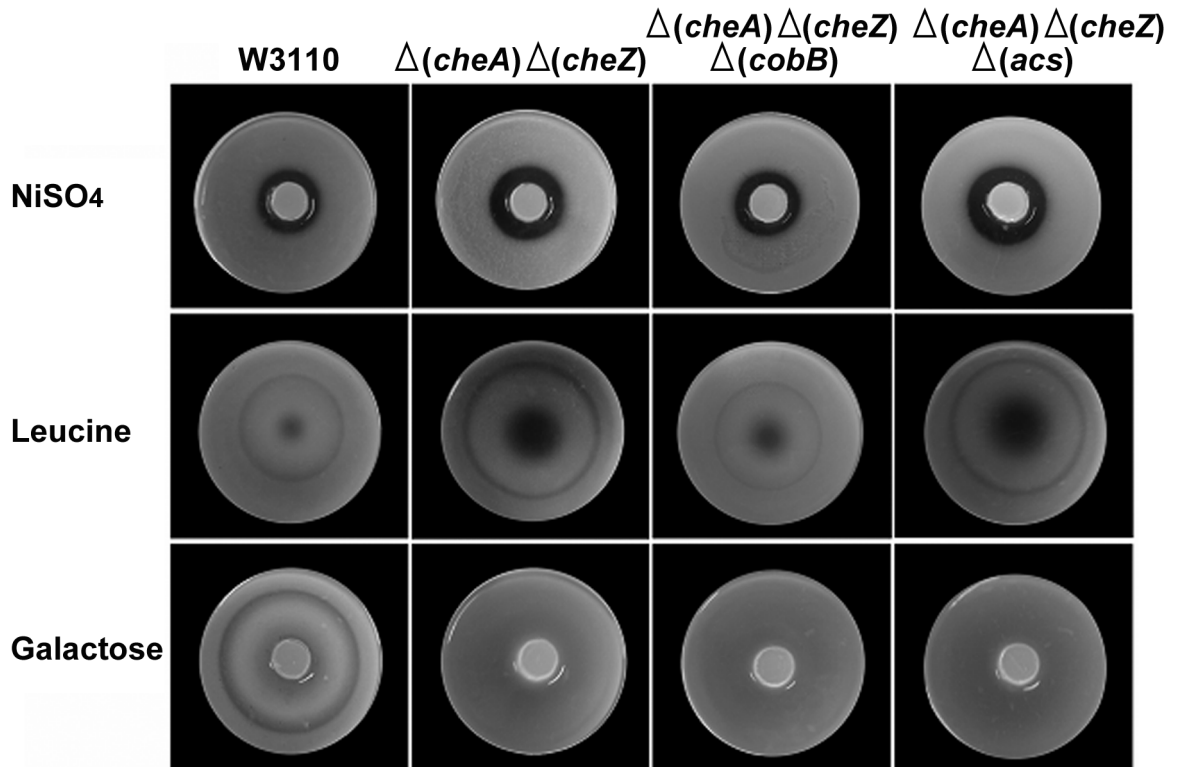

**Fig. S6.** Plug assays and drop assays of W3110,  $\Delta(\text{cheA}) \Delta(\text{cheZ})$ ,  $\Delta(\text{cheA}) \Delta(\text{cheZ}) \Delta(\text{cobB})$  and  $\Delta(\text{cheA}) \Delta(\text{cheZ}) \Delta(\text{acs})$ . The concentrations of NiSO<sub>4</sub> plug, leucine drop and galactose plug were 25 mM, 100 mM and 50 mM, respectively. Experiments were replicated four times, and representative results are shown.

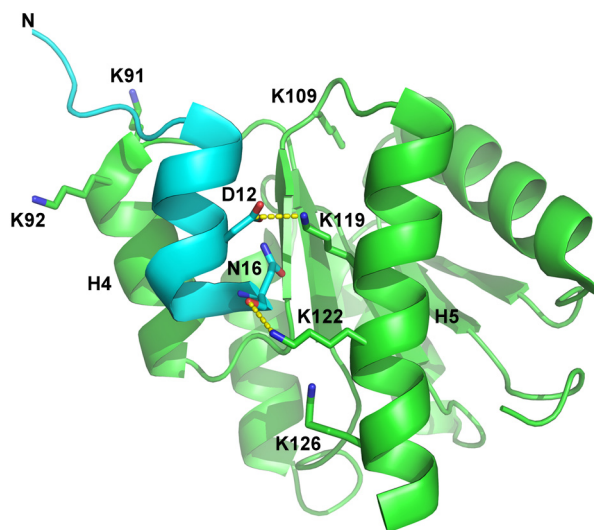

**Fig. S7.** Cartoon diagram of the structure of BeF<sub>3</sub><sup>-</sup>-CheY-FliM<sub>16</sub> complex. FliM<sub>16</sub> is shown in cyan and CheY is shown in green. Broken yellow lines highlight salt bridges between K119 and D12, K122 and N16.
